# Supplementary material for: Performance of matrices developed to identify patients with early rheumatoid arthritis with rapid radiographic progression despite methotrexate therapy: an external validation study based on the ESPOIR cohort data
Source: PubMed Central journal article supplement — RMD Open. 2016 May 20;2(1):e000245. doi: 10.1136/rmdopen-2016-000245 (PMC4879338; doi:10.1136/rmdopen-2016-000245), 2016-05-20
Supplement: rmdopen-2016-000245supp_table1.pdf [file rmdopen-2016-000245supp_table1.pdf]

**Supplementary material - table 1:** Characteristics of patients with early rheumatoid arthritis (RA) and variables used for the tested matrices.

| Cohort/reference | Design                                               | RA population<br>Demographics                                                             | Characteristics                                                                                           | Matrix variables |                   |                                                          | Treatment                                                        |
|------------------|------------------------------------------------------|-------------------------------------------------------------------------------------------|-----------------------------------------------------------------------------------------------------------|------------------|-------------------|----------------------------------------------------------|------------------------------------------------------------------|
|                  |                                                      |                                                                                           |                                                                                                           | Clinical         | Biomarker         | Radiography                                              |                                                                  |
| ASPIRE (17, 30)  | RCT<br>MTX vs.<br>MTX+IFX                            | Early RA<br>MTX-naïve<br>N=1049<br>Mean age 51 yrs<br>Female 71%                          | Mean symptom duration:<br>0.8 yr<br>Mean DAS28: 6.6<br>Mean HAQ 1.5<br>RF+: 72%<br>Erosive disease 82%    | SJC /66          | CRP or ESR<br>RF  | -                                                        | Stratification by<br>- MTX alone<br>- or MTX + IFX               |
| BeSt (24, 32)    | RCT<br>MTX vs.<br>Triple<br>therapy<br>or<br>MTX+IFX | Early RA DMARD-<br>naïve RA<br>N=465<br>Mean age 54 yrs<br>Female 68%                     | Mean symptom duration<br>0.6 yr<br>Mean DAS44: 4.5<br>Mean HAQ 1.5<br>RF+: 65%<br>Erosive disease 82%     | -                | CRP<br>RF or ACPA | Erosion score                                            | Stratification by<br>- MTX alone<br>- or COBRA<br>- or MTX + IFX |
| SWEFOT (25, 31)  | RCT<br>MTX+IFX<br>Vs.<br>Combo<br>synthetic<br>DMARD | Early RA<br>MTX-IR<br>N=258<br>Mean age 52 yrs<br>Female 77%                              | Mean symptom duration<br>0.6 yr<br>Mean DAS28: 4.8<br>Mean HAQ 1.3<br>RF+: 67%<br>Erosive disease 82%     | Smoking status   | CRP               | ≥ 1 erosion                                              |                                                                  |
| SONORA (26)      | Cohort                                               | New-onset RA<br>DMARD-naïve RA<br>N=994<br>Mean age 53 yrs<br>Female 72%                  | Mean symptom duration:<br>n.a.<br>Mean DAS28: 4.4<br>Mean HAQ: n.a.<br>RF+: n.a.<br>Erosive disease: n.a. | DAS28            | CRP<br>RF or ACPA | vSHS                                                     |                                                                  |
| ESPOIR (28)      | Cohort                                               | New-onset RA<br>DMARD-naïve<br>Treated with MTX<br>N=370<br>Mean age 49 yrs<br>Female 73% | Mean symptom duration:<br>0.6 yrs<br>Mean DAS28: 5.4<br>Mean HAQ: 1.0<br>RF+: 55%<br>Erosive disease: 18% | SJC              | CRP<br>ACPA       | RA typical<br>erosion<br>or<br>vSHS (modified<br>matrix) |                                                                  |

RCT: randomized controlled trial – MTX: methotrexate – IFX: infliximab -- DMARD: disease-modifying anti-rheumatic drug -- RF: rheumatoid factor – -  
- ACPA: anti-citrullinated protein antibodies -- CRP: C-reactive protein – ESR: erythrocyte sedimentation rate – DAS28: Disease Activity Score in 28  
joints using ESR – HAQ: Health Assessment Questionnaire – SJC: swollen joint count -- n.a.: not available – vSHS: van der Heijde-modified Sharp  
score
